# Supplementary material for: The formation and mitigation of nitrate pollution: Comparison between urban and suburban environments
Source: Copernicus journal article supplement (doi:10.5194/acp-2021-730), 2021-10-21
Supplement: Supplementary file 1 [file acp-2021-730-supplement.pdf]

1 **The formation and mitigation of nitrate pollution:**  
2 **Comparison between urban and suburban environments**

3 Suxia Yang<sup>1,2</sup>, Bin Yuan<sup>1,2\*</sup>, Yuwen Peng<sup>1,2</sup>, Shan Huang<sup>1,2</sup>, Wei Chen<sup>3</sup>, Weiwei Hu<sup>3</sup>,  
4 Chenglei Pei<sup>3,4,5,6</sup>, Jun Zhou<sup>1,2</sup>, David D. Parrish<sup>1</sup>, Wenjie Wang<sup>7</sup>, Xianjun He<sup>1,2</sup>,  
5 Chunlei Cheng<sup>2,8</sup>, Xiaobing Li<sup>1,2</sup>, Xiaoyun Yang<sup>1,2</sup>, Yu Song<sup>8</sup>, Haichao Wang<sup>9</sup>, Jipeng  
6 Qi<sup>1,2</sup>, Baolin Wang<sup>10</sup>, Chen Wang<sup>10</sup>, Chaomin Wang<sup>1,2</sup>, Zelong Wang<sup>1,2</sup>, Tiange Li<sup>1,2</sup>,  
7 E Zheng<sup>1,2</sup>, Sihang Wang<sup>1,2</sup>, Caihong Wu<sup>1,2</sup>, Mingfu Cai<sup>1,2</sup>, Chenshuo Ye<sup>6</sup>, Wei Song<sup>3</sup>,  
8 Peng Cheng<sup>7</sup>, Duohong Chen<sup>6</sup>, Xinming Wang<sup>3</sup>, Zhanyi Zhang<sup>1,2</sup>, Xuemei Wang<sup>1,2</sup>,  
9 Junyu Zheng<sup>1,2</sup>, Min Shao<sup>1,2\*</sup>

10 <sup>1</sup>Institute for Environmental and Climate Research, Jinan University, Guangzhou  
11 511443, China

12 <sup>2</sup>Guangdong-Hongkong-Macau Joint Laboratory of Collaborative Innovation for  
13 Environmental Quality, Jinan University, Guangzhou 511443, China

14 <sup>3</sup>State Key Laboratory of Organic Geochemistry and Guangdong Key Laboratory of  
15 Environmental Protection and Resources Utilization, Guangzhou Institute of  
16 Geochemistry, Chinese Academy of Sciences, Guangzhou 510640, China

17 <sup>4</sup>CAS Center for Excellence in Deep Earth Science, Guangzhou, 510640, China

18 <sup>5</sup>University of Chinese Academy of Sciences, Beijing 100049, China

19 <sup>6</sup>Guangzhou Ecological and Environmental Monitoring Center of Guangdong Province,  
20 Guangzhou 510060, China

21 <sup>7</sup>State Joint Key Laboratory of Environmental Simulation and Pollution Control,  
22 College of Environmental Sciences and Engineering, Peking University, Beijing  
23 100871, China

24 <sup>8</sup>Institute of Mass Spectrometry and Atmospheric Environment, Guangdong Provincial  
25 Engineering Research Center for on-line Source Apportionment System of Air  
26 Pollution, Jinan University, Guangzhou 510632, China

27 <sup>9</sup>School of Atmospheric Sciences, Sun Yat-Sen University, Guangzhou 510275, China

28

29 <sup>10</sup>School of Environmental Science and Engineering, Qilu University of Technology,  
30 Jinan 250353, China

31

32 \*Correspondence to: Bin Yuan (byuan@jnu.edu.cn) and Min Shao  
33 (mshao@pku.edu.cn)

34

35 **Text S1.** Split model configuration

36 During the observation periods, the diurnal variations of planetary boundary  
37 layer (PBL) at the GIG and Heshan sites are shown in Fig.S1 (a, b), which are based on  
38 data from the website of NOAA Air Resource Laboratory  
39 (<https://ready.arl.noaa.gov/READYamet.php>). The PBL height decreased significantly  
40 at 17:00, which would decouple into nocturnal surface boundary layer (NBL) and  
41 residual layer (RL). Besides, O<sub>3</sub> and NO<sub>x</sub> at the ground site and 488 m site of Canton  
42 Tower agreed well during the day (shown in Fig. 5 (a) ~ (c)), and started to show clear  
43 distinction from 17:00, thus we define 17:00 as the sunset time. At that time, the box  
44 was initialized by the last condition of the daytime model, and was separated into NBL  
45 and RL boxes. As the average boundary layer height was 400 m and 1000 m in the  
46 nighttime and daytime respectively, the heights of NBL and RL were set to 400 m and  
47 600 m (Fig.S1 (c)). Both nighttime boxes were simulated from 17:00 to the next  
48 morning 06:00, at which time the PBL height began to gradually increase. After 06:00,  
49 we assumed RL and NBL layer began to mix as the NBL height linearly increased,  
50 instantaneously mixing once per hour until 10:00, the mixing process was completed,  
51 and two boxes were combined as a whole box. The mixed layer height was set as 1000  
52 m in the simulation of daytime from 10:00 to 17:00.

53 In the nighttime at the GIG site, the trace gases of NO<sub>2</sub> and O<sub>3</sub>, meteorological  
54 parameters RH and *T* in the RL box, were constrained by the measurements from the  
55 488 m site at Canton Tower. Several arguments justify this approach. Firstly, the trace  
56 gases at the surface GIG site were comparable with the Canton ground site in Fig.5,  
57 especially during the nighttime; the mean concentration deviations for NO, NO<sub>2</sub> and O<sub>3</sub>  
58 between the GIG and Canton ground sites were 1.96%, 6.54% and 0.65%, respectively.  
59 In addition, given the short distance between locations, we expect the composition of  
60 the aloft RL layer at GIG site to be closely represented by the Canton 488 m site. The  
61 O<sub>3</sub> at the Canton 488 m site was higher than at the ground site, and relatively unaffected  
62 by surface NO emissions, which would promote the nighttime NO<sub>3</sub> - N<sub>2</sub>O<sub>5</sub> chemistry.  
63 The temporal evolution of other species in the RL, such as NO and VOCs, were  
64 unconstrained, and thus calculated by the box model.

65 However, there was no measurement aloft available for the campaign at Heshan  
 66 site. Therefore, all species observed at Heshan site at 17:00 are set as the initial inputs  
 67 for the RL box to freely evolve over night. To test this setting, we performed a  
 68 simulation experiment using observations at GIG and Canton Tower sites. In analog to  
 69 the settings of Heshan site, the observations at 17:00 at the GIG site were used as the  
 70 initial inputs of RL, and allowed the initial data to freely evolve at night, without the  
 71 influence from surface emissions. As shown in Fig.S6, the simulated nighttime results  
 72 of NO<sub>2</sub> and NO<sub>x</sub> in the RL compared well with the observation at the 488 m site of  
 73 Canton Tower, which showed good agreements. Simulated O<sub>3</sub> and O<sub>x</sub> were lower than  
 74 the observations at the 488 m site of Canton Tower, but were within the combined  
 75 uncertainties.

76 The physical loss that parameterized as a dilution process with a lifetime of 24 h  
 77 was the same as the daytime simulation in both the NBL and RL. In addition to this  
 78 loss, the dry deposition rate for HNO<sub>3</sub> and O<sub>3</sub> were treated as first-order loss reactions  
 79 in the model, set as 2.7 and 0.42 cm s<sup>-1</sup> in the daytime, 0.88 and 0.14 cm s<sup>-1</sup> in the  
 80 nighttime NBL, as the deposition rate is known to decrease after sunset (Zhang et al.,  
 81 2003;Womack et al., 2019).

## 82 **Text S2** Calculation of nitrate production

83 The different mechanisms that increased nitrate concentrations in the simulations  
 84 included three contributions: the reaction of OH and NO<sub>2</sub>, heterogenous N<sub>2</sub>O<sub>5</sub> uptake  
 85 to the ground in the NBL, and nitrate mixed to the ground from the RL in the morning.  
 86 The first two contributions were calculated by Eq. S (1) and Eq. S (2), combined with  
 87 the R1 and R5 listed in the main text, which represented the nitrate production rate in  
 88 surface boundary layer. The OH, N<sub>2</sub>O<sub>5</sub> were based on the model results.  $k_{[OH][NO_2]}$  was  
 89 from the website of MCMv3.3.1 (<https://mcm.york.ac.uk/>).

$$90 \quad P_{OH+NO_2} = k_{[OH][NO_2]}[OH][NO_2] * F \quad S(1)$$

$$91 \quad P_{NBL(N_2O_5 \text{ uptake})} = \frac{\omega_1 * \gamma * Sa}{4} [N_2O_5](2 - \varphi) * F \quad S(2)$$

92 The production rate of OH + NO<sub>2</sub> in the model is the total HNO<sub>3</sub> production rate.  
 93 The heterogenous N<sub>2</sub>O<sub>5</sub> uptake production rate in the NBL is based on S (2), here F

94 represents the partition ratio between HNO<sub>3</sub> and nitrate, which is calculated by Cp/ (Cp  
 95 + Cg), where Cp and Cg are the observed concentration of nitrate and HNO<sub>3</sub>,  
 96 respectively.

97 With the convective growth of the planetary boundary layer (PBL) following  
 98 sunrise, the polluted species in RL are vertically entrained into the NBL, which changes  
 99 surface pollutant concentrations (Curci et al., 2015; Chen et al., 2020). We assume the  
 100 entrainment mixing process occurred from 6:00 to 10:00 (shown in Fig.S1 (c)), when  
 101 the height of PBL ( $H_{PBL}$ ) increased from 400 m to 1000 m, on the contrary, the height  
 102 of RL ( $H_{RL}$ ) linearly decreased from 600 m to 0 m, the nitrate produced from NBL and  
 103 RL would participate in this process. The instantaneous mixed nitrate concentration  
 104 ( $C_{mixed}$ ) was the sum of nitrate mixed from RL ( $C_{RL}$ ) and NBL ( $C_{NBL}$ ), and the nitrate  
 105 enhancement from the mixing process ( $P_{mixed}$ ) was calculated by the difference of mixed  
 106 nitrate concentration and the NBL nitrate concentration ( $C_{NBL}$ ), which was described as  
 107 follows:

$$108 \quad C_{mixed,i} = C_{RL,i} \times \frac{H_{RL,i-1} - H_{RL,i}}{H_{PBL,i}} + C_{NBL,i} \times \frac{H_{PBL,i-1}}{H_{PBL,i}} \quad S (3)$$

$$109 \quad P_{mixed,i} = C_{mixed,i} - C_{NBL,i} \quad S (4)$$

110 here  $i$  and  $i-1$  represent the current and previous time step, the changing height of  
 111 different layers represent the weight coefficient of mixed nitrate concentration in RL  
 112 and NBL. The hourly surface nitrate production was the sum of  $P_{OH+NO_2}$ ,  
 113  $P_{NBL(N_2O_5 \text{ uptake})}$  and  $P_{mixed}$ , the total nitrate production in one day included the  
 114 integral production of  $P_{OH+NO_2}$  in the daytime (7:00 to 17:00),  $P_{NBL(N_2O_5 \text{ uptake})}$  in the  
 115 nighttime (from 17:00 to 6:00 in the next morning), and  $P_{mixed}$  from 6:00 to 10:00 in the  
 116 morning.

117 **Text S3** Sensitivity test of isopleth diagrams from F0AM box model simulations.

118 In addition to the discussions about model simulation, several parameters used in  
 119 the box model might influence the simulation results, which include the concentrations  
 120 of HONO, the N<sub>2</sub>O<sub>5</sub> uptake coefficient ( $\gamma$ ) and the ClNO<sub>2</sub> yield ( $\phi$ ) (Lammel and Cape,  
 121 1996). Due to the uncertainty of HONO source and limited measurements, previous  
 122 studies used the ratio between HONO and NO<sub>x</sub> to constrain HONO, such as 0.8% in

123 the high density traffic period in urban areas (Kurtenbach et al., 2001), 2% in the global  
124 chemical transport model (Elshorbany et al., 2012; Tan et al., 2019). In this study, we  
125 used the observed HONO as the base case, and ran the model in different sensitivity  
126 scenarios: with 0.8% of NO<sub>x</sub>, with 2% of NO<sub>x</sub> and with 2% of NO<sub>2</sub> as HONO  
127 concentrations (Fig. S8). Despite the different concentrations of HONO used in the  
128 simulation, they all showed similar variation patterns for ozone and nitrate, indicating  
129 little influence of the HONO concentration parameterization on the simulation results.  
130 The  $\gamma$  and  $\phi$  changed widely between laboratory and field studies (Mozurkewich and  
131 Calvert, 1988; Riedel et al., 2014; Wang et al., 2017; Yun et al., 2018; McDuffie et al.,  
132 2018). The parameterized  $\gamma$  and  $\phi$  by updated empirical method by Yu et al. (2020) was  
133 applied in the base model. As we only chose the median value of  $\phi$  as the input  
134 parameter; thus, different values of  $\phi$  were selected to perform sensitivity simulation  
135 (Fig. S9). Compared with the base case, the sensitivity of nitrate did not change with  
136 different values of  $\phi$ , and the peak values of nitrate showed little difference. Overall,  
137 varying HONO and the ClNO<sub>2</sub> yield would not be expected to change the sensitivity  
138 region of ozone and nitrate.  
139

140 **Table S1.** Measured chemical species and the analytical methods, time resolution,  
 141 limit of detection and the accuracy of the instruments used for different measured  
 142 species.

| chemical species                                                                               | methods             | time resolution | limit of detection                | accuracy         |
|------------------------------------------------------------------------------------------------|---------------------|-----------------|-----------------------------------|------------------|
| NMHC                                                                                           | GC-FID-MS           | 1 h             | 10 ~ 84 ppt                       | 0.65% ~<br>9.14% |
| Formaldehyde                                                                                   | PTR-TOF-MS          | 1 min           | 20 ppt                            | 11.8%            |
| Acetaldehyde                                                                                   | PTR-TOF-MS          | 1 min           | 33 ppt                            | 12.5%            |
| HNO <sub>3</sub>                                                                               | TOF-CIMS            | 1 min           | < 10 ppt                          | ± 20%            |
| N <sub>2</sub> O <sub>5</sub>                                                                  | TOF-CIMS            | 1 min           | < 10 ppt                          | ± 25%            |
| ClNO <sub>2</sub>                                                                              | TOF-CIMS            | 1 min           | < 10 ppt                          | ± 25%            |
| NH <sub>3</sub>                                                                                | CRDS                | 1 min           | 1.0 ppb                           | ± 35%            |
| NH <sub>3</sub>                                                                                | GAC                 | 30 mins         | 0.08 ppb                          | —                |
| HONO                                                                                           | LOPAP               | 1 min           | 6.0 ppt                           | ± 20%            |
| HONO                                                                                           | GAC                 | 30 mins         | 0.1 ppb                           | —                |
| O <sub>3</sub>                                                                                 | UV absorption       | 1 min           | 0.5 ppb                           | ± 10%            |
| NO/NO <sub>2</sub> /NO <sub>x</sub>                                                            | Chemiluminescence   | 1 min           | 0.4 ppb                           | ± 10%            |
| CO                                                                                             | Infrared absorption | 1 min           | 0.04 ppm                          | ± 10%            |
| NO <sub>3</sub> <sup>-</sup> , SO <sub>4</sub> <sup>2-</sup> ,<br>NH <sub>4</sub> <sup>+</sup> | TOF-AMS             | 300 s           | 0.005~0.024<br>μg m <sup>-3</sup> | ± 20%            |
| Sa                                                                                             | APS, SMPS           | 300s            | —                                 | ± 10%            |
| Photolysis frequencies                                                                         | Spectrometer        | 10 s            | —                                 | ± 10%            |

143

144 **Table S2.** The mean volumetric concentrations of VOCs detected at the GIG and Heshan sites (Units: ppb)

| Site               | GIG          | Heshan    | Species                | GIG          | Heshan    |
|--------------------|--------------|-----------|------------------------|--------------|-----------|
| Species            | Average ± SD |           | Species                | Average ± SD |           |
| Ethane             | 3.71±1.24    | 3.18±0.71 | n-Heptane              | 0.11±0.15    | 0.24±0.23 |
| Ethene             | 1.78±1.05    | 1.77±0.98 | 2-Methylheptane        | 0.02±0.02    | 0.13±0.2  |
| Propane            | 6.88±5.1     | 4.22±1.85 | 3-Methylheptane        | 0.02±0.02    | 0.14±0.21 |
| Propene            | 0.4±0.41     | 0.28±0.18 | Toluene                | 2.02±1.9     | 3.44±1.65 |
| i-Butane           | 1.76±1.32    | 1.64±0.8  | n-Octane               | 0.05±0.05    | 0.25±0.18 |
| n-Butane           | 3.15±2.46    | 3.17±1.67 | Ethylbenzene           | 0.32±0.32    | 1.04±0.65 |
| Acetylene          | 1.93±0.74    | 2.25±0.78 | m/p-Xylene             | 0.91±0.87    | 4.01±2.22 |
| trans-2-Butene     | 0.03±0.03    | 0±0.01    | Nonane                 | 0.04±0.03    | 0.24±0.07 |
| 1-Butene           | 0.08±0.05    | 0.05±0.04 | o-Xylene               | 0.33±0.33    | 1.38±0.88 |
| cis-2-Butene       | 0.02±0.02    | —         | Styrene                | 0.13±0.22    | 0.44±0.57 |
| i-Pentane          | 1.33±1.06    | 2.38±2.6  | Isopropylbenzene       | 0.01±0.01    | 0.1±0.1   |
| n-Pentane          | 0.76±0.68    | 2.37±3.65 | n-Propylbenzene        | 0.01±0.01    | 0.11±0.06 |
| 1-Pentene          | 0.03±0.02    | 0.01±0.01 | m-Ethyltoluene         | 0.03±0.03    | 0.14±0.06 |
| trans-2-Pentene    | 0.01±0.02    | 0±0.01    | p-Ethyltoluene         | 0.02±0.02    | 0.15±0.07 |
| Isoprene           | 0.14±0.15    | 0.14±0.19 | n-Decane               | 0.02±0.02    | 0.06±0.02 |
| cis-2-Pentene      | 0.01±0.01    | 0±0.01    | 1,3,5-Trimethylbenzene | 0.02±0.02    | 0.13±0.04 |
| 2,2-Dimethylbutane | 0.04±0.03    | 0.04±0.02 | o-Ethyltoluene         | 0.02±0.01    | 0.1±0.03  |
| 2,3-Dimethylbutane | 0.06±0.05    | 0.53±0.31 | 1,2,4-Trimethylbenzene | 0.06±0.07    | 0.1±0.05  |
| 1-Hexene           | 0.02±0.01    | 0.02±0.06 | 1,2,3-Trimethylbenzene | 0.02±0.01    | 0.06±0.02 |
| n-Hexane           | 0.58±0.83    | 0.41±0.27 | n-Undecane             | 0.01±0.01    | —         |
| 2-Methylhexane     | 0.11±0.14    | 0.31±0.24 | n-Dodecane             | 0.06±0.04    | —         |
| 3-Methylhexane     | 0.13±0.18    | 0.32±0.25 | Formaldehyde           | 2.53±1.62    | 2.42±1.2  |
| Benzene            | 0.46±0.17    | 0.58±0.2  | Acetaldehyde           | 1.95±1.2     | 3.14±1.64 |



146 **Table S3.** The concentrations of chemical components (average  $\pm$  standard deviation)  
 147 and meteorological parameters during the investigated periods at the GIG and Heshan  
 148 sites

| Site                                                   | GIG             | Heshan          |
|--------------------------------------------------------|-----------------|-----------------|
| PM <sub>1</sub> ( $\mu\text{g m}^{-3}$ )               | 41.7 $\pm$ 23.1 | 40.6 $\pm$ 15.5 |
| Organic ( $\mu\text{g m}^{-3}$ )                       | 16.9 $\pm$ 9.0  | 21.6 $\pm$ 9.0  |
| SO <sub>4</sub> <sup>2-</sup> ( $\mu\text{g m}^{-3}$ ) | 10.1 $\pm$ 4.6  | 6.9 $\pm$ 1.8   |
| NO <sub>3</sub> <sup>-</sup> ( $\mu\text{g m}^{-3}$ )  | 6.1 $\pm$ 5.8   | 3.9 $\pm$ 3.0   |
| NH <sub>4</sub> <sup>+</sup> ( $\mu\text{g m}^{-3}$ )  | 5.0 $\pm$ 3.0   | 3.5 $\pm$ 1.5   |
| Cl <sup>-</sup> ( $\mu\text{g m}^{-3}$ )               | 0.6 $\pm$ 0.54  | 0.8 $\pm$ 1.3   |
| BC ( $\mu\text{g m}^{-3}$ )                            | 3.2 $\pm$ 1.1   | 4.0 $\pm$ 1.6   |
| WS (m/s)                                               | 1.9 $\pm$ 0.9   | 1.6 $\pm$ 0.7   |
| RH (%)                                                 | 76.2 $\pm$ 14.9 | 59.5 $\pm$ 14.3 |
| T( $^{\circ}$ C)                                       | 23.0 $\pm$ 2.6  | 23.2 $\pm$ 3.2  |

150

151

152 **Table S4.** Model performance for nitrate at GIG and Heshan sites

| Site   | Species                             | Observed | Modeled | MB <sup>a</sup> | RMSE <sup>b</sup> | IOA <sup>c</sup> | r <sup>d</sup> |
|--------|-------------------------------------|----------|---------|-----------------|-------------------|------------------|----------------|
| GIG    | Nitrate<br>( $\mu\text{g m}^{-3}$ ) | 6.2      | 7.4     | 1.2             | 4.9               | 0.84             | 0.77           |
| Heshan | Nitrate<br>( $\mu\text{g m}^{-3}$ ) | 3.9      | 3.91    | 0.12            | 1.4               | 0.71             | 0.59           |

153 <sup>a</sup>: mean bias (MB), here we define the  $Obs_i$  and  $Mod_i$  as the observed and modeled  
 154 values at time  $i$ , respectively, and  $N$  represents the number of observations.

155 
$$MB = \frac{\sum (Mod_i - Obs_i)}{N}$$

156 <sup>b</sup>: root mean square error (RMSE);

157 
$$RMSE = \sqrt{\frac{1}{N} \left( \sum_{i=1}^N (Mod_i - Obs_i)^2 \right)}$$

158 <sup>c</sup>: index of agreement (IOA),  $Obs_{aver}$  and  $Mod_{aver}$  represent the average  
 159 concentration of observation and model, respectively.

160 
$$IOA = 1 - \frac{\sum_{i=1}^N (Obs_i - Mod_i)^2}{\sum_{i=1}^N (|Obs_i - Obs_{aver}| + |Mod_i - Mod_{aver}|)^2}$$

161 <sup>d</sup>: the Pearson's correlation ( $r$ )

162

163 **Table S5.** OH radical production reactions included in the model simulation

164

| Source                | Reactions                                |
|-----------------------|------------------------------------------|
| Primary Source        | HONO photolysis                          |
|                       | O <sup>1</sup> D + H <sub>2</sub> O      |
|                       | H <sub>2</sub> O <sub>2</sub> photolysis |
| ROx propagation cycle | VOCs + O <sub>3</sub>                    |
|                       | HO <sub>2</sub> + NO                     |

165

166

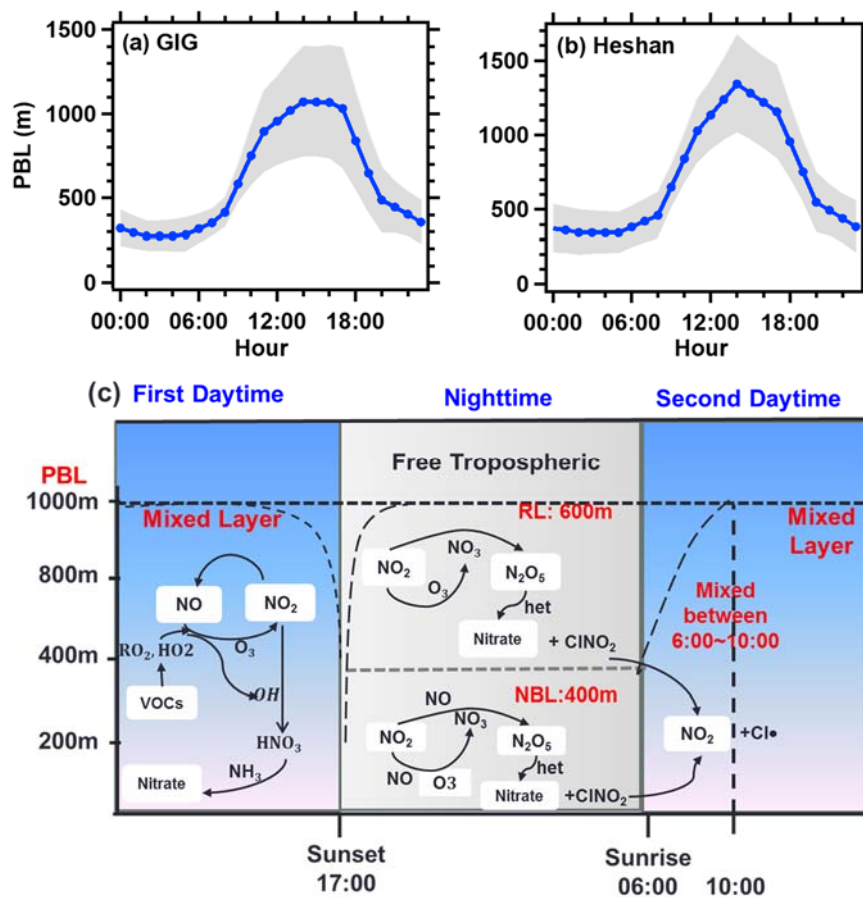

167

168 **Figure S1.** Diurnal variations of mean Planetary Boundary Layer (PBL) heights at (a)

169 GIG site and (b) Heshan site, which were obtained from the NOAA Air Resource

170 Laboratory website (<https://ready.arl.noaa.gov/READYamet.php>); (c) Schematic of

171 PBL evolution and chemistry in the box model.

172

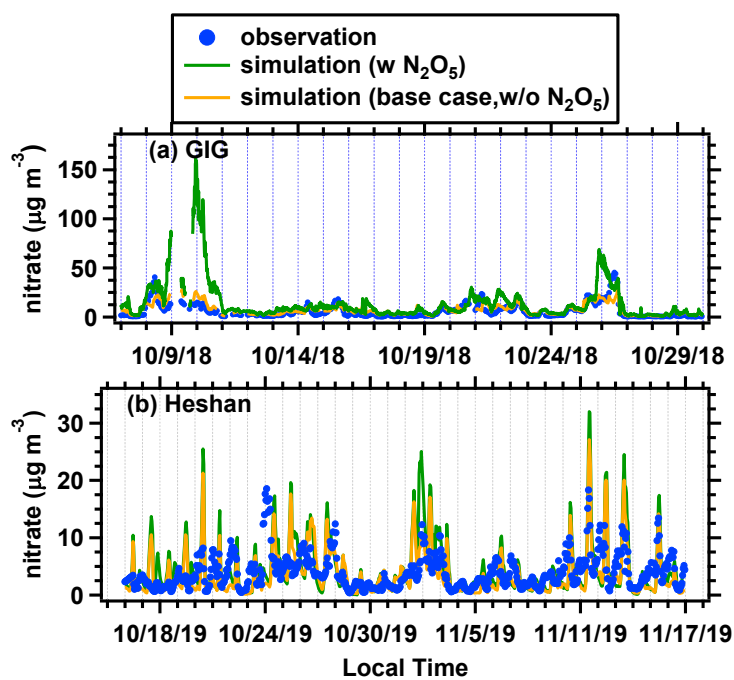

173

174 **Figure S2.** Comparison of the simulated and observed nitrate concentrations at (a) GIG  
 175 site and (b) Heshan site. The orange lines represent simulated results of the base case  
 176 without  $\text{N}_2\text{O}_5$  constrained, and green lines represent the simulated results with  $\text{N}_2\text{O}_5$   
 177 constrained.

178

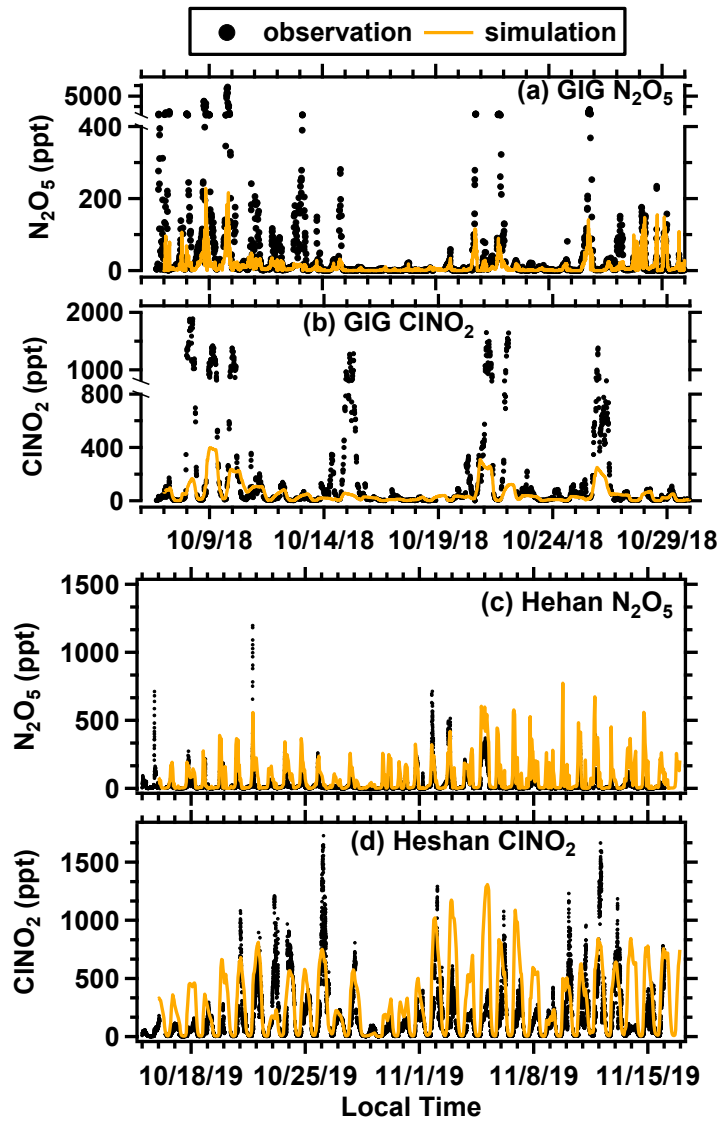

179

180 **Figure S3.** Comparison of the simulated and observed  $N_2O_5$  and  $ClNO_2$  concentrations  
 181 at (a,b) GIG site and (c,d) Heshan site.

182

183

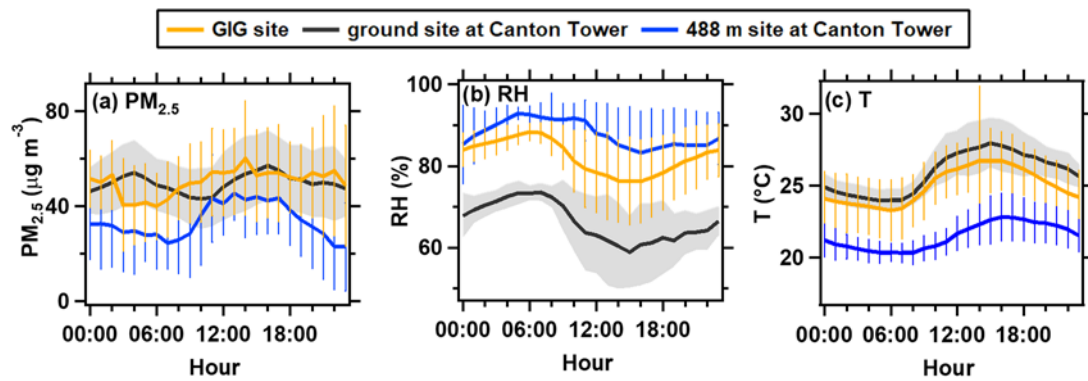

185

186 **Figure S4.** Diurnal variation of mean concentrations of (a)  $PM_{2.5}$ , (b) RH and (c)  $T$  at  
 187 GIG, ground site and 488m site of Canton Tower. The orange lines represent the  
 188 measurements at GIG site, and the blue and black lines represent the measurements at  
 189 488 m and ground site of Canton Tower, respectively. The orange and blue error bars  
 190 represent the standard deviations of the mean concentrations at GIG site and 488m site  
 191 of Canton Tower, and the grey areas show one standard deviation of the mean  
 192 concentration at ground site of Canton Tower.

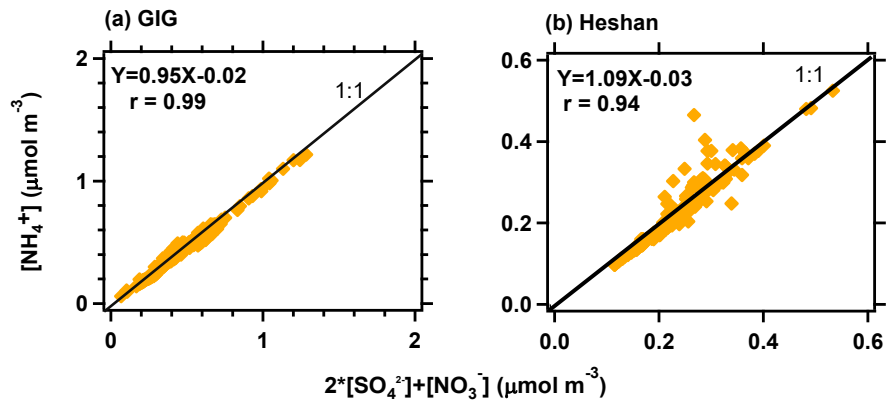

193

194 **Figure S5.** Scatter plot of  $[\text{NH}_4^+]$  molar concentration versus  $2*[\text{SO}_4^{2-}] + [\text{NO}_3^-]$  at the  
 195 (a) GIG site and (b) Heshan site.

196

197



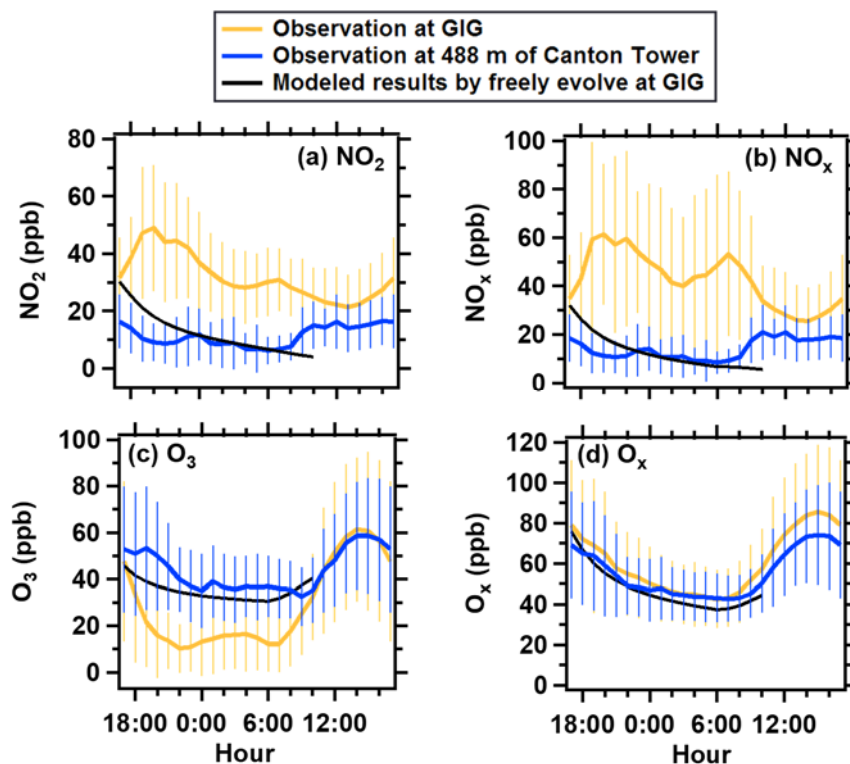

198

199 **Figure S6.** Time series of the simulated trace gases ( $\text{NO}_2$ ,  $\text{NO}_x$ ,  $\text{O}_3$  and  $\text{O}_x$ ) in the RL,  
 200 when the observations at 17:00 at GIG were setting as the initial inputs of the RL  
 201 simulation and all chemical species were freely evolved in the box model. The  
 202 observations at GIG and 488m site of Canton Tower are also shown for comparison.  
 203 The error bars represent the standard deviation of the observations.

204

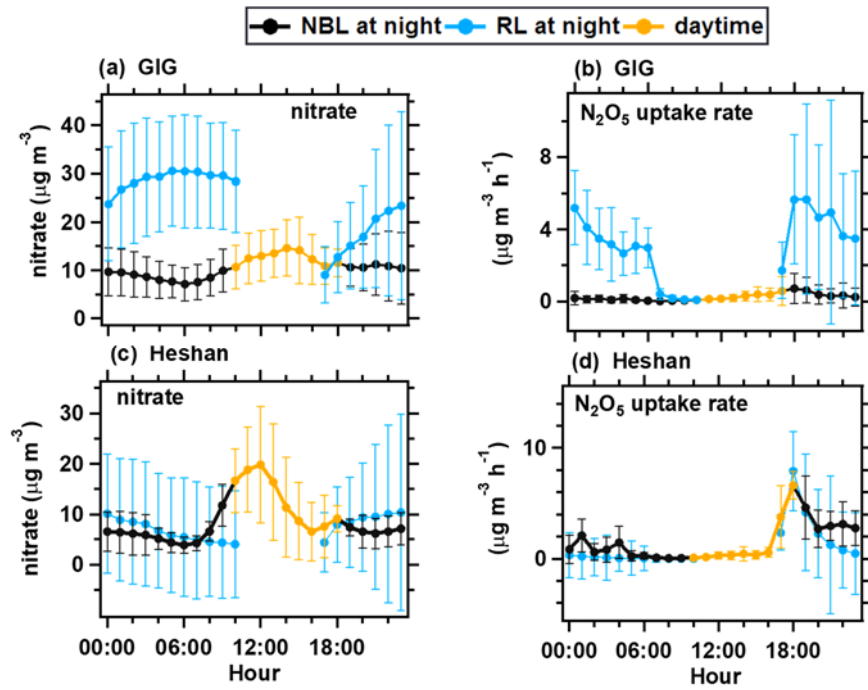

205

206 **Figure S7.** Comparison of the daily-averaged simulated nitrate and N<sub>2</sub>O<sub>5</sub> uptake rate in

207 the NBL and RL at the (a, b) GIG site and (c, d) Heshan site. The error bars represent

208 the standard deviation of the average data.

209

210

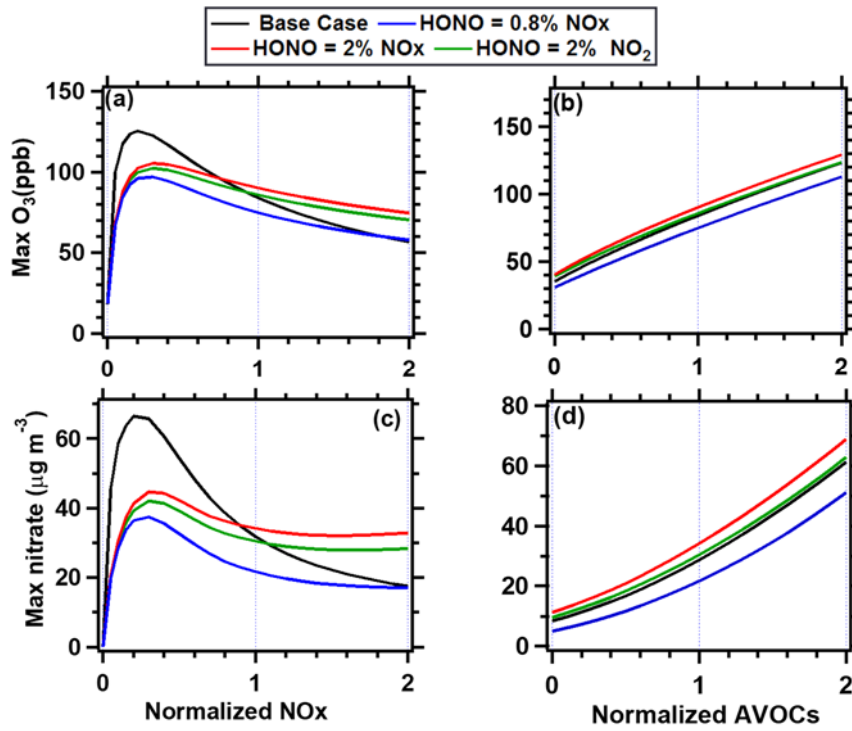

212

213 **Figure S8.** Sensitivity tests of HONO parameterization on the production of (a, b)  
 214 ozone and (c, d) nitrate as a function of the normalized NOx and AVOCs relative to the  
 215 base concentration at the GIG site.

216

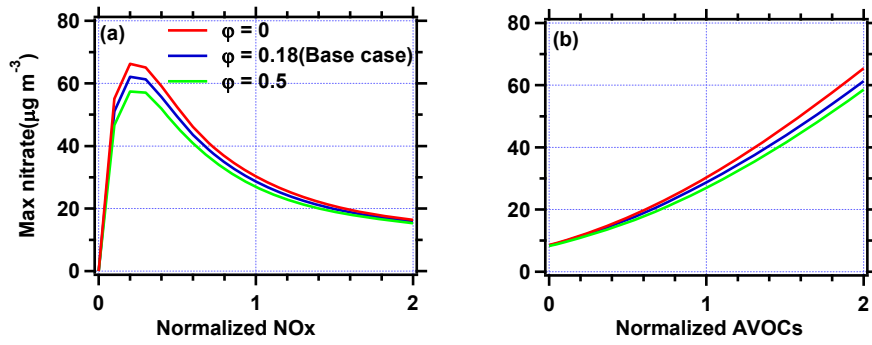

217

218 **Figure S9.** Sensitivity tests of the production yield of  $\text{ClNO}_2$  ( $\phi$  value) on maximum  
 219 nitrate concentrations as a function of the normalized NOx and AVOCs relative to the  
 220 base concentration at the GIG site.

221

222

223 **Reference**

- 224 Chen, X., Wang, H., Lu, K., Li, C., Zhai, T., Tan, Z., Ma, X., Yang, X., Liu, Y., Chen,  
225 S., Dong, H., Li, X., Wu, Z., Hu, M., Zeng, L., and Zhang, Y.: Field Determination of  
226 Nitrate Formation Pathway in Winter Beijing, *Environmental Science & Technology*,  
227 10.1021/acs.est.0c00972, 2020.
- 228 Curci, G., Ferrero, L., Tuccella, P., Barnaba, F., Angelini, F., Bolzacchini, E., Carbone,  
229 C., Der Gon, H. A. C. D. V., Facchini, M. C., and Gobbi, G. P.: How much is particulate  
230 matter near the ground influenced by upper-level processes within and above the PBL?  
231 A summertime case study in Milan (Italy) evidences the distinctive role of nitrate,  
232 *Atmospheric Chemistry and Physics*, 15, 2629-2649, 2015.
- 233 Elshorbany, Y. F., Steil, B., Brühl, C., and Lelieveld, J.: Impact of HONO on global  
234 atmospheric chemistry calculated with an empirical parameterization in the EMAC  
235 model, *Atmospheric Chemistry and Physics*, 12, 9977-10000, 2012.
- 236 Kurtenbach, R., Becker, K. H., Gomes, J. A. G., Kleffmann, J., Lörzer, J. C., Spittler,  
237 M., Wiesen, P., Ackermann, R., Geyer, A., and Platt, U.: Investigations of emissions  
238 and heterogeneous formation of HONO in a road traffic tunnel, *Atmospheric  
239 Environment*, 35, 3385-3394, [https://doi.org/10.1016/S1352-2310\(01\)00138-8](https://doi.org/10.1016/S1352-2310(01)00138-8), 2001.
- 240 Lammel, G., and Cape, J. N.: Nitrous acid and nitrite in the atmosphere, *Chemical  
241 Society Reviews*, 25, 361-369, 10.1039/CS9962500361, 1996.
- 242 Lin, Y. C., Zhang, Y. L., Fan, M. Y., and Bao, M.: Heterogeneous formation of  
243 particulate nitrate under ammonium-rich regimes during the high-PM<sub>2.5</sub> events in  
244 Nanjing, China, *Atmos. Chem. Phys.*, 20, 3999-4011, 10.5194/acp-20-3999-2020, 2020.
- 245 McDuffie, E. E., Fibiger, D. L., Dubé, W. P., Lopez-Hilfiker, F., Lee, B. H., Thornton,  
246 J. A., Shah, V., Jaeglé, L., Guo, H., Weber, R. J., Michael Reeves, J., Weinheimer, A. J.,  
247 Schroder, J. C., Campuzano-Jost, P., Jimenez, J. L., Dibb, J. E., Veres, P., Ebben, C.,  
248 Sparks, T. L., Wooldridge, P. J., Cohen, R. C., Hornbrook, R. S., Apel, E. C., Campos,  
249 T., Hall, S. R., Ullmann, K., and Brown, S. S.: Heterogeneous N<sub>2</sub>O<sub>5</sub> Uptake During  
250 Winter: Aircraft Measurements During the 2015 WINTER Campaign and Critical  
251 Evaluation of Current Parameterizations, *Journal of Geophysical Research:  
252 Atmospheres*, 123, 4345-4372, 10.1002/2018JD028336, 2018.
- 253 Mozurkewich, M., and Calvert, J. G.: Reaction probability of N<sub>2</sub>O<sub>5</sub> on aqueous  
254 aerosols, *Journal of Geophysical Research: Atmospheres*, 93, 15889-15896,  
255 10.1029/JD093iD12p15889, 1988.
- 256 Riedel, T. P., Wolfe, G. M., Danas, K. T., Gilman, J. B., Kuster, W. C., Bon, D. M.,  
257 Vlasenko, A., Li, S. M., Williams, E. J., Lerner, B. M., Veres, P. R., Roberts, J. M.,  
258 Holloway, J. S., Lefer, B., Brown, S. S., and Thornton, J. A.: An MCM modeling study  
259 of nitryl chloride (CINO<sub>2</sub>) impacts on oxidation, ozone production and  
260 nitrogen oxide partitioning in polluted continental outflow, *Atmos. Chem. Phys.*, 14,  
261 3789-3800, 10.5194/acp-14-3789-2014, 2014.
- 262 Tan, Z., Lu, K., Jiang, M., Su, R., Wang, H., Lou, S., Fu, Q., Zhai, C., Tan, Q., Yue, D.,  
263 Chen, D., Wang, Z., Xie, S., Zeng, L., and Zhang, Y.: Daytime atmospheric oxidation  
264 capacity in four Chinese megacities during the photochemically polluted season: a case  
265 study based on box model simulation, *Atmos. Chem. Phys.*, 19, 3493-3513,  
266 10.5194/acp-19-3493-2019, 2019.

267 Wang, H., Lu, K., Chen, X., Zhu, Q., Chen, Q., Guo, S., Jiang, M., Li, X., Shang, D.,  
268 Tan, Z., Wu, Y., Wu, Z., Zou, Q., Zheng, Y., Zeng, L., Zhu, T., Hu, M., and Zhang, Y.:  
269 High N<sub>2</sub>O<sub>5</sub> Concentrations Observed in Urban Beijing: Implications of a Large Nitrate  
270 Formation Pathway, *Environmental Science & Technology Letters*, 4, 416-420,  
271 10.1021/acs.estlett.7b00341, 2017.

272 Womack, C. C., McDuffie, E. E., Edwards, P. M., Bares, R., de Gouw, J. A., Docherty,  
273 K. S., Dube, W. P., Fibiger, D. L., Franchin, A., Gilman, J. B., Goldberger, L., Lee, B.  
274 H., Lin, J. C., Long, R., Middlebrook, A. M., Millet, D. B., Moravek, A., Murphy, J. G.,  
275 Quinn, P. K., Riedel, T. P., Roberts, J. M., Thornton, J. A., Valin, L. C., Veres, P. R.,  
276 Whitehill, A. R., Wild, R. J., Warneke, C., Yuan, B., Baasandorj, M., and Brown, S. S.:  
277 An odd oxygen framework for wintertime ammonium nitrate aerosol pollution in urban  
278 areas: NO<sub>x</sub> and VOC control as mitigation strategies, *Geophysical Research Letters*, 0,  
279 10.1029/2019gl082028, 2019.

280 Yu, C., Wang, Z., Xia, M., Fu, X., Wang, W., Tham, Y. J., Chen, T., Zheng, P., Li, H.,  
281 Shan, Y., Wang, X., Xue, L., Zhou, Y., Yue, D., Ou, Y., Gao, J., Lu, K., Brown, S. S.,  
282 Zhang, Y., and Wang, T.: Heterogeneous N<sub>2</sub>O<sub>5</sub> reactions on atmospheric aerosols at  
283 four Chinese sites: improving model representation of uptake parameters, *Atmos. Chem.*  
284 *Phys.*, 20, 4367-4378, 10.5194/acp-20-4367-2020, 2020.

285 Yun, H., Wang, W., Wang, T., Xia, M., Yu, C., Wang, Z., Poon, S. C. N., Yue, D., and  
286 Zhou, Y.: Nitrate formation from heterogeneous uptake of dinitrogen pentoxide during  
287 a severe winter haze in southern China, *Atmos. Chem. Phys.*, 18, 17515-17527,  
288 10.5194/acp-18-17515-2018, 2018.

289 Zhang, L., Brook, J. R., and Vet, R.: A revised parameterization for gaseous dry  
290 deposition in air-quality models, *Atmos. Chem. Phys.*, 3, 2067-2082, 10.5194/acp-3-  
291 2067-2003, 2003.

292
