# Supplementary material for: The formation and mitigation of nitrate pollution: Comparison between urban and suburban environments
Source: Copernicus journal article supplement (doi:10.5194/acp-2021-730), 2021-10-21
Supplement: Supplementary file [file acp-2021-730-RC3-supplement.pdf]

The authors describe a recent field campaign at an urban, suburban, and tower measurement site near Guangzhou, China. They use these observations to construct a box model for the production of nitrate aerosol, and demonstrate that the urban area is in a VOC-limited regime, while the suburban site is at a transition point. The tower measurements yield critical information about the contribution of different production mechanisms in the nocturnal boundary and residual layers.

Overall, this is a very good paper that provides new constraints on an important pollution issue, and I recommend publication. I have only a few minor comments.

General comments: Would the authors include more details about what (if any) biogenic VOCs are included in the model.

Line 82 – Previous work has emphasized the importance of particle pH in nitrate aerosol formation, so this should be discussed at some point. See Guo, H., Otjes, R., Schlag, P., Kiendler-Scharr, A., Nenes, A., and Weber, R. J.: Effectiveness of ammonia reduction on control of fine particle nitrate, *Atmos. Chem. Phys.*, 18, 12241-12256, 2018 as an example.

Line 134 – What is meant by “different environments”? The authors should be a little more clear about what makes this paper different than other recent papers discussing NO<sub>x</sub> and VOC sensitivity in urban areas in China.

Line 155 – Change “upward” to “upwind”

Line 157 – It’s not clear here whether the tower measurements were taken during the same timeframe as the GIG ground site.

Line 164 – Were the aethelometer and particle size distributions taken at the GIG site? If so, change line 157 to read “The chemical components of PM<sub>1</sub>, trace gases, NMHC, and particle BC content and size were measured....”

Line 196 – A reference detailing the MCM should be cited here.

Line 229 – State what the observed parameters were.

Line 373 – Where does the estimate of the nocturnal boundary layer and residual layer fractions as 0.4 / 0.6 come from? Is this an empirical observation during the study or an estimate based on theory?

Figure 4: I would suggest putting the modeled diurnal observations on the observation to make the comparison more clear.
